# Supplementary material for: Effects of a social stimulus on gene expression in a mouse model of fragile X syndrome
Source: PubMed Central journal article supplement (PMC5481916; doi:10.1186/s13229-017-0148-6), 2017-06-23
Supplement: 13229_2017_148_MOESM6_ESM.pdf [file 13229_2017_148_MOESM6_ESM.pdf]

# Most Commonly Differentially Expressed Genes

Comparisons in Each Brain Area

LA

MA

PFC

| Gene Symbol | LA       |         | MA        |           | PFC         |          |         |           |           |             |          |         |           |           |             |
|-------------|----------|---------|-----------|-----------|-------------|----------|---------|-----------|-----------|-------------|----------|---------|-----------|-----------|-------------|
|             | MvsWinNS | MvsWinS | SvsNSinWT | SvsNSinMU | Interaction | MvsWinNS | MvsWinS | SvsNSinWT | SvsNSinMU | Interaction | MvsWinNS | MvsWinS | SvsNSinWT | SvsNSinMU | Interaction |
| Epn3        | -        | X       | -         | -         | X           | -        | X       | -         | -         | X           | -        | -       | -         | -         | X           |
| Fabp7       | X        | -       | X         | -         | X           | -        | -       | -         | -         | -           | X        | -       | X         | -         | X           |
| Kremen1     | X        | -       | X         | -         | X           | -        | -       | X         | -         | X           | -        | X       | X         | -         | X           |
| Pbx3        | X        | -       | X         | -         | X           | -        | -       | -         | -         | -           | X        | -       | X         | -         | X           |
| Pomc        | X        | -       | X         | -         | X           | X        | X       | X         | X         | X           | -        | X       | -         | -         | -           |
| Th          | -        | X       | X         | X         | X           | -        | -       | X         | -         | X           | -        | X       | X         | -         | X           |
