# Supplementary material for: Effects of a social stimulus on gene expression in a mouse model of fragile X syndrome
Source: Springer Nature journal article supplement (doi:10.1186/s13229-017-0148-6), 2017-06-23
Supplement: MOESM1 [file 12467672]

LA

MA

PFC

NS.MT.1

0.99

1.00

NS.MT.1

0.92

0.95

NS.MT.1

0.99

0.99

NS.MT.2

0.99

NS.MT.2

0.98

NS.MT.2

0.99

NS.MT.3

NS.MT.3

NS.MT.3

NS.WT.1

0.99

0.99

NS.WT.1

0.97

0.99

NS.WT.1

0.99

0.99

NS.WT.2

0.99

NS.WT.2

0.97

NS.WT.2

0.98

NS.WT.3

NS.WT.3

NS.WT.3

S.MT.1

0.99

0.99

S.MT.1

0.89

0.94

S.MT.1

0.99

0.99

S.MT.2

0.98

S.MT.2

0.98

S.MT.2

1.00

S.MT.3

S.MT.3

S.MT.3

S.WT.1

0.99

0.98

S.WT.1

0.94

0.93

S.WT.1

0.99

0.98

S.WT.2

0.99

S.WT.2

0.99

S.WT.2

0.99

S.WT.3

S.WT.3

S.WT.3
